# Supplementary material
Source: MDPI journal article supplement (https://www.mdpi.com/2304-6775/9/4/55)
Supplement: s1 [file s1]

## SUPPLEMENTARY MATERIALS

Article

# Scientific Research in Ecuador: A Bibliometric Analysis

Supplementary Materials:

**Table S1.** Most representative journal articles of the universities scientific production.

| No. | Journal Articles                                                                 | Total documents | CiteScore 2019 | SJR <sup>1</sup> | P <sup>2</sup> | Q <sup>3</sup> |
|-----|----------------------------------------------------------------------------------|-----------------|----------------|------------------|----------------|----------------|
| 1   | RISTI - Revista Iberica de Sistemas e Tecnologias de Informacao                  | 513             | 0.4            | 0.145            | 11             | 4              |
| 2   | Espacios                                                                         | 511             | 0.5            | 0.215            | 19             | 4              |
| 3   | Physical Review Letters                                                          | 267             | 15.6           | 3.588            | 95             | 1              |
| 4   | PLoS ONE                                                                         | 259             | 5.2            | 1.023            | 91             | 1              |
| 5   | Physical Review D                                                                | 216             | 8.6            | 1.664            | 95             | 1              |
| 6   | Revista Ecuatoriana de Neurologia                                                | 196             | 0.3            | 0.139            | 10             | 4              |
| 7   | Physics Letters, Section B: Nuclear, Elementary Particle and High-Energy Physics | 193             | 9.4            | 1.795            | 93             | 1              |
| 8   | Journal of High Energy Physics                                                   | 185             | 10.2           | 0.948            | 94             | 1              |
| 9   | Archivos Venezolanos de Farmacología y Terapéutica                               | 152             | 0.4            | 0.187            | 17             | 4              |
| 10  | Sustainability (Switzerland)                                                     | 124             | 3.2            | 0.581            | 80             | 1              |
| 11  | Zootaxa                                                                          | 110             | 1.7            | 0.578            | 53             | 2              |
| 12  | Revista Cubana de Investigaciones Biomédicas                                     | 106             | 0.5            | 0.232            | 38             | 3              |
| 13  | Revista Electronica de Veterinaria                                               | 102             | 0.1            | 0.105            | 6              | 4              |
| 14  | American Journal of Tropical Medicine and Hygiene                                | 96              | 4              | 1.182            | 67             | 2              |
| 15  | IEEE Latin America Transactions                                                  | 90              | 2.1            | 0.334            | 61             | 2              |
| 16  | IEEE Access                                                                      | 86              | 3.9            | 0.775            | 84             | 1              |
| 17  | European Physical Journal C                                                      | 83              | 8.2            | 1.763            | 94             | 1              |
| 18  | Ornitología Neotropical                                                          | 80              | 0.7            | 0.181            | 20             | 4              |
| 19  | Sensors (Switzerland)                                                            | 78              | 5              | 0.653            | 87             | 1              |
| 20  | Scientific Reports                                                               | 75              | 7.2            | 1.341            | 93             | 1              |
| 21  | Revista Bionatura                                                                | 75              | 0.2            | 0.109            | 8              | 4              |
| 22  | Journal of Volcanology and Geothermal Research                                   | 74              | 5.1            | 1.409            | 80             | 1              |
| 23  | Revista Venezolana de Gerencia                                                   | 73              | 0.4            | 0.165            | 24             | 4              |
| 24  | Revista de Ciencias Sociales                                                     | 71              | 0.6            | 0.219            | 43             | 3              |
| 25  | Phytotaxa                                                                        | 71              | 1.8            | 0.446            | 52             | 2              |

<sup>1</sup> SJR: Scimago Journal Rank; <sup>2</sup> P: Percentile; <sup>3</sup> Q: Quartile.

**Table S2.** Most representative conference articles of the universities scientific production.

| No. | Conference Paper                                                                              | Total documents | CiteScore 2019 | SJR <sup>1</sup> | P <sup>2</sup> | Q <sup>3</sup> |
|-----|-----------------------------------------------------------------------------------------------|-----------------|----------------|------------------|----------------|----------------|
| 1   | Advances in Intelligent Systems and Computing                                                 | 693             | 0.9            | 0.184            | 27             | 3              |
| 2   | Iberian Conference on Information Systems and Technologies (CISTI)                            | 363             | -              | 0.18             | -              | -              |
| 3   | Communications in Computer and Information Science                                            | 360             | 0.7            | 0.188            | 31             | 3              |
| 4   | Lecture Notes in Computer Science (LNCS)                                                      | 346             | 1.9            | 0.427            | 57             | 2              |
| 5   | Latin American and Caribbean Consortium of Engineering Institutions (LACCEI)                  | 217             | -              | -                | -              | -              |
| 6   | Association for Computing Machinery - ACM's International Conference Proceeding Series (ICPS) | 163             | 0.8            | 0.2              | 19             | 4              |
| 7   | IEEE Ecuador Technical Chapters Meeting (ETCM 2017)                                           | 101             | -              | -                | -              | -              |
| 8   | IEEE Andescon Technology and Innovation for Andean Industry (ANDESCON 2020)                   | 92              | -              | -                | -              | -              |
| 9   | Smart Innovation, Systems and Technologies (SIST)                                             | 91              | 0.9            | 0.18             | 28             | 3              |
| 10  | Central Europe - CEUR Workshop Proceedings                                                    | 87              | 0.6            | 0.177            | 16             | 4              |
| 11  | IEEE Ecuador Technical Chapters Meeting (ETCM 2018)                                           | 81              | -              | -                | -              | -              |

|    |                                                                                                               |    |     |       |    |   |
|----|---------------------------------------------------------------------------------------------------------------|----|-----|-------|----|---|
| 12 | Society of Photo-Optical Instrumentation Engineers (SPIE) - The International Society for Optical Engineering | 69 | 1   | 0.215 | 27 | 3 |
| 13 | IEEE Ecuador Technical Chapters Meeting (ETCM 2016)                                                           | 53 | -   | 0.17  | -  | - |
| 14 | Eighth International Conference on eDemocracy & eGovernment (ICEDEG 2018)                                     | 52 | -   | -     | -  | - |
| 15 | International Conference on Information Systems and Computer Science (INCISCOS 2017)                          | 50 | -   | -     | -  | - |
| 16 | IEEE Ecuador Technical Chapters Meeting (ETCM 2019)                                                           | 50 | -   | -     | -  | - |
| 17 | Conference on Electrical, Electronics Engineering, Information and Communication Technologies (CHILECON 2017) | 46 | -   | -     | -  | - |
| 18 | International Conference on Information Systems and Computer Science (INCISCOS 2018)                          | 45 | -   | -     | -  | - |
| 19 | International Federation for Medical and Biological Engineering (IFMBE) Proceedings                           | 44 | -   | -     | -  | - |
| 20 | International Conference on Information Systems and Computer Science (INCISCOS 2019)                          | 42 | -   | -     | -  | - |
| 21 | American Institute of Physics-AIP Conference Proceedings                                                      | 42 | 0.6 | 0.19  | 15 | 4 |
| 22 | IEEE Asia-Pacific Conference on Computer Aided System Engineering (APCASE 2015)                               | 40 | -   | -     | -  | - |
| 23 | Eighth International Conference on eDemocracy & eGovernment (ICEDEG 2019)                                     | 40 | -   | -     | -  | - |
| 24 | IEEE PES Innovative Smart Grid Technologies Latin America (ISGT LATAM 2017)                                   | 36 | -   | -     | -  | - |
| 25 | Eighth International Conference on eDemocracy & eGovernment (ICEDEG 2017)                                     | 35 | -   | -     | -  | - |

<sup>1</sup> SJR: Scimago Journal Rank; <sup>2</sup> P: Percentile; <sup>3</sup> Q: Quartile.

**Table S3.** Top 5 of author in main subject areas (2011-2020).

| Subject areas                        | Authors             | Actual Affiliation                                    | Country       | Period Publications |       | Annual Index |        |
|--------------------------------------|---------------------|-------------------------------------------------------|---------------|---------------------|-------|--------------|--------|
|                                      |                     |                                                       |               | Documents           | Cites | Documents    | Cites  |
| Computer Science                     | Andaluz, V.H.       | Universidad de las Fuerzas Armadas (ESPE)             | Ecuador       | 118                 | 649   | 11.80        | 64.90  |
|                                      | Guarda, T.          | Universidad Estatal Península de Santa Elena (UPSE)   | Ecuador       | 95                  | 85    | 9.50         | 8.50   |
|                                      | Aguilar, J.         | Universidad Regional Autónoma de los Andes (UNIANDES) | Venezuela     | 84                  | 1091  | 8.40         | 109.10 |
|                                      | Luján-Mora, S.      | Universitat d'Alacant                                 | Spain         | 82                  | 1131  | 8.20         | 113.10 |
|                                      | Robles-Bykbaev, V.  | Universidad Politécnica Salesiana (UPS)               | Ecuador       | 76                  | 144   | 7.60         | 14.40  |
| Agricultural and Biological Sciences | Guayasamin, J.M.    | Universidad San Francisco de Quito (USFQ)             | Ecuador       | 60                  | 1712  | 6.00         | 171.20 |
|                                      | Greeney, H.F.       | Yanayacu Biological Station                           | Ecuador       | 57                  | 1321  | 5.70         | 132.10 |
|                                      | Torres-Carvajal, O. | Pontificia Universidad Católica del Ecuador (PUCE)    | Ecuador       | 53                  | 1351  | 5.30         | 135.10 |
|                                      | Dangles, O.         | Université de Montpellier                             | France        | 47                  | 2960  | 4.70         | 296.00 |
|                                      | Valencia, R.        | Pontificia Universidad Católica del Ecuador (PUCE)    | Ecuador       | 43                  | 5753  | 4.30         | 575.30 |
| Medicine                             | Del Brutto, O.H.    | Universidad Espíritu Santo (UEES)                     | Ecuador       | 219                 | 5439  | 21.90        | 543.90 |
|                                      | Chedraui, P.        | Universidad Católica de Santiago de Guayaquil (UCSG)  | Ecuador       | 132                 | 3762  | 13.20        | 376.20 |
|                                      | Mera, R.M.          | Gilead Sciences Incorporated                          | United States | 114                 | 3660  | 11.40        | 366.00 |
|                                      | Pérez-López, F.R.   | Universidad de Zaragoza                               | Spain         | 90                  | 3418  | 9.00         | 341.80 |
|                                      | Zambrano, M.        | The Atahualpa Project                                 | Ecuador       | 88                  | 856   | 8.80         | 85.60  |

|                                              |                    |                                                      |               |     |       |       |         |
|----------------------------------------------|--------------------|------------------------------------------------------|---------------|-----|-------|-------|---------|
| Engineering                                  | Parashar, N.       | Purdue University Northwest                          | United States | 73  | 72426 | 7.30  | 7242.60 |
|                                              | Wood, D.           | Northeastern University                              | United States | 73  | 71682 | 7.30  | 7168.20 |
|                                              | Aarrestad, T.K.    | European Organization for Nuclear Research           | Switzerland   | 73  | 17432 | 7.30  | 1743.20 |
|                                              | Abbaneo, D.        | European Organization for Nuclear Research           | Switzerland   | 73  | 67184 | 7.30  | 6718.40 |
|                                              | Abbiendi, G.       | Alma Mater Studiorum Università di Bologna           | Italy         | 73  | 67352 | 7.30  | 6735.20 |
| Social Sciences                              | Luján-Mora, S.     | Universitat d'Alacant                                | Spain         | 56  | 1131  | 5.60  | 113.10  |
|                                              | Piedra, N.         | Universidad Técnica Particular de Loja (UTPL)        | Ecuador       | 35  | 473   | 3.50  | 47.30   |
|                                              | Chicaiza, J.       | Universidad Técnica Particular de Loja (UTPL)        | Ecuador       | 23  | 348   | 2.30  | 34.80   |
|                                              | Robles-Bykbaev, V. | Universidad Politécnica Salesiana (UPS)              | Ecuador       | 23  | 144   | 2.30  | 14.40   |
|                                              | Ochoa, X.          | NYU Steinhardt                                       | United States | 21  | 1026  | 2.10  | 102.60  |
| Environmental Science                        | Dangles, O.        | Université de Montpellier                            | France        | 29  | 2960  | 2.90  | 296.00  |
|                                              | Gómez-Salgado, J.  | Universidad Espíritu Santo (UEES)                    | Ecuador       | 28  | 269   | 2.80  | 26.90   |
|                                              | Crespo, P.         | Universidad de Cuenca (UCUENCA)                      | Ecuador       | 26  | 733   | 2.60  | 73.30   |
|                                              | Célleri, R.        | Universidad de Cuenca (UCUENCA)                      | Ecuador       | 25  | 1468  | 2.50  | 146.80  |
|                                              | Toulkeridis, T.    | Universidad de las Fuerzas Armadas (ESPE)            | Ecuador       | 24  | 902   | 2.40  | 90.20   |
| Biochemistry, Genetics and Molecular Biology | Chedraui, P.       | Universidad Católica de Santiago de Guayaquil (UCSG) | Ecuador       | 65  | 3762  | 6.50  | 376.20  |
|                                              | Paz-y-Miño, C.     | Universidad Tecnológica Equinoccial (UTE)            | Ecuador       | 45  | 702   | 4.50  | 70.20   |
|                                              | Pérez-López, F.R.  | Universidad de Zaragoza                              | Spain         | 42  | 3418  | 4.20  | 341.80  |
|                                              | López-Cortés, A.   | Universidad Tecnológica Equinoccial (UTE)            | Ecuador       | 35  | 374   | 3.50  | 37.40   |
|                                              | Burgos, G.         | Universidad de las Américas                          | Ecuador       | 33  | 92    | 3.30  | 9.20    |
| Physics and Astronomy                        | Lincoln, D.        | Fermi National Accelerator Laboratory                | United States | 653 | 67323 | 65.30 | 6732.30 |
|                                              | Ruchti, R.         | University of Notre Dame                             | United States | 653 | 76824 | 65.30 | 7682.40 |
|                                              | Varelas, N.        | University of Illinois at Chicago                    | United States | 653 | 85480 | 65.30 | 8548.00 |
|                                              | Wayne, M.          | University of Notre Dame                             | United States | 653 | 76678 | 65.30 | 7667.80 |
|                                              | Askew, A.          | Florida State University                             | United States | 653 | 75001 | 65.30 | 7500.10 |
| Mathematics                                  | Andaluz, V.H.      | Universidad de las Fuerzas Armadas (ESPE)            | Ecuador       | 81  | 649   | 8.10  | 64.90   |
|                                              | Camacho, O.        | Escuela Politécnica Nacional (EPN)                   | Ecuador       | 53  | 605   | 5.30  | 60.50   |

|                                    |                          |                                              |         |    |      |      |        |
|------------------------------------|--------------------------|----------------------------------------------|---------|----|------|------|--------|
| Earth and<br>Planetary<br>Sciences | Peluffo-Ordóñez,<br>D.H. | Universidad Yachay Tech<br>(YACHAYTECH)      | Ecuador | 41 | 442  | 4.10 | 44.20  |
|                                    | Aguilar, W.G.            | Universidad de las Fuerzas Armadas<br>(ESPE) | Ecuador | 35 | 627  | 3.50 | 62.70  |
|                                    | Robles-Bykbaev,<br>V.    | Universidad Politécnica Salesiana<br>(UPS)   | Ecuador | 33 | 144  | 3.30 | 14.40  |
|                                    | Toulkeridis, T.          | Universidad de las Fuerzas Armadas<br>(ESPE) | Ecuador | 43 | 902  | 4.30 | 90.20  |
|                                    | Mothes, P.               | Escuela Politécnica Nacional (EPN)           | Ecuador | 34 | 1505 | 3.40 | 150.50 |
|                                    | Ruiz, M.                 | Escuela Politécnica Nacional (EPN)           | Ecuador | 33 | 1615 | 3.30 | 161.50 |
|                                    | Hidalgo, S.              | Escuela Politécnica Nacional (EPN)           | Ecuador | 28 | 558  | 2.80 | 55.80  |
|                                    | Alvarado, A.             | Escuela Politécnica Nacional (EPN)           | Ecuador | 27 | 546  | 2.70 | 54.60  |
